# Supplementary material for: Reprofiling of pyrimidine-based DAPK1/CSF1R dual inhibitors: identification of 2,5-diamino-4-pyrimidinol derivatives as novel potential anticancer lead compounds
Source: PubMed Central journal article supplement (PMC6913669; doi:10.1080/14756366.2019.1699554), 2019-12-06
Supplement: IENZ_A_1699554_SM0421.pdf [file IENZ_A_1699554_SM0421.pdf]

# **Reprofiling of pyrimidine-based DAPK1/CSF1R dual inhibitors: Identification of 2,5-diamino-4-pyrimidinol derivatives as novel potential anticancer lead compounds**

**Ahmed Karam Farag<sup>a,\*</sup>, Ahmed H.E. Hassan<sup>b</sup>, Buyng Sun Ahn<sup>c,d</sup>, Ki Duk Park<sup>d,e</sup>, Eun Joo Roh<sup>c,d,\*</sup>**

*<sup>a</sup> RI Translational Research Team, Division of Applied RI, Korea Institute of Radiological and Medical Sciences (KIRAMS), Seoul, 01812, Republic of Korea.*

*<sup>b</sup> Department of Medicinal Chemistry, Faculty of Pharmacy, Mansoura University, Mansoura, 35516, Egypt.*

*<sup>c</sup> Chemical Kinomics Research Center, Korea Institute of Science and Technology (KIST), Seoul 02792, Republic of Korea.*

*<sup>d</sup> Division of Bio-Medical Science & Technology, KIST School, University of Science and Technology, Seoul, 02792, Republic of Korea.*

*<sup>e</sup> Convergence Research Center for Diagnosis, Treatment and Care System of Dementia, Korea Institute of Science and Technology (KIST), Republic of Korea.*

## **\*Corresponding authors:**

Ahmed Karam Farag (email address: ahmed@kirams.re.kr; postal address: RI Translational Research Team, Division of Applied RI, Korea Institute of Radiological and Medical Sciences, 75 Nowon-ro, Nowon-gu, Seoul, 01812, Republic of Korea).

Eun Joo Roh (email address: r8636@kist.re.kr; postal address: Korea Institute of Science and Technology, Materials and Life Science Research Division, Chemical Kinomics Research Center, Hwarang-ro 14-gil 5, Seongbuk-gu, Seoul, 02792, Republic of Korea).

## Contents

1. **Representative spectral data for the novel compounds.**
2. **Biological experimental data**
  - 2.1. ***In vitro* antiproliferative assay using M-NFS-60 cell lines**
  - 2.2. **PAMPA-GIT assay**

# 1. Representative spectral data for the novel compounds.

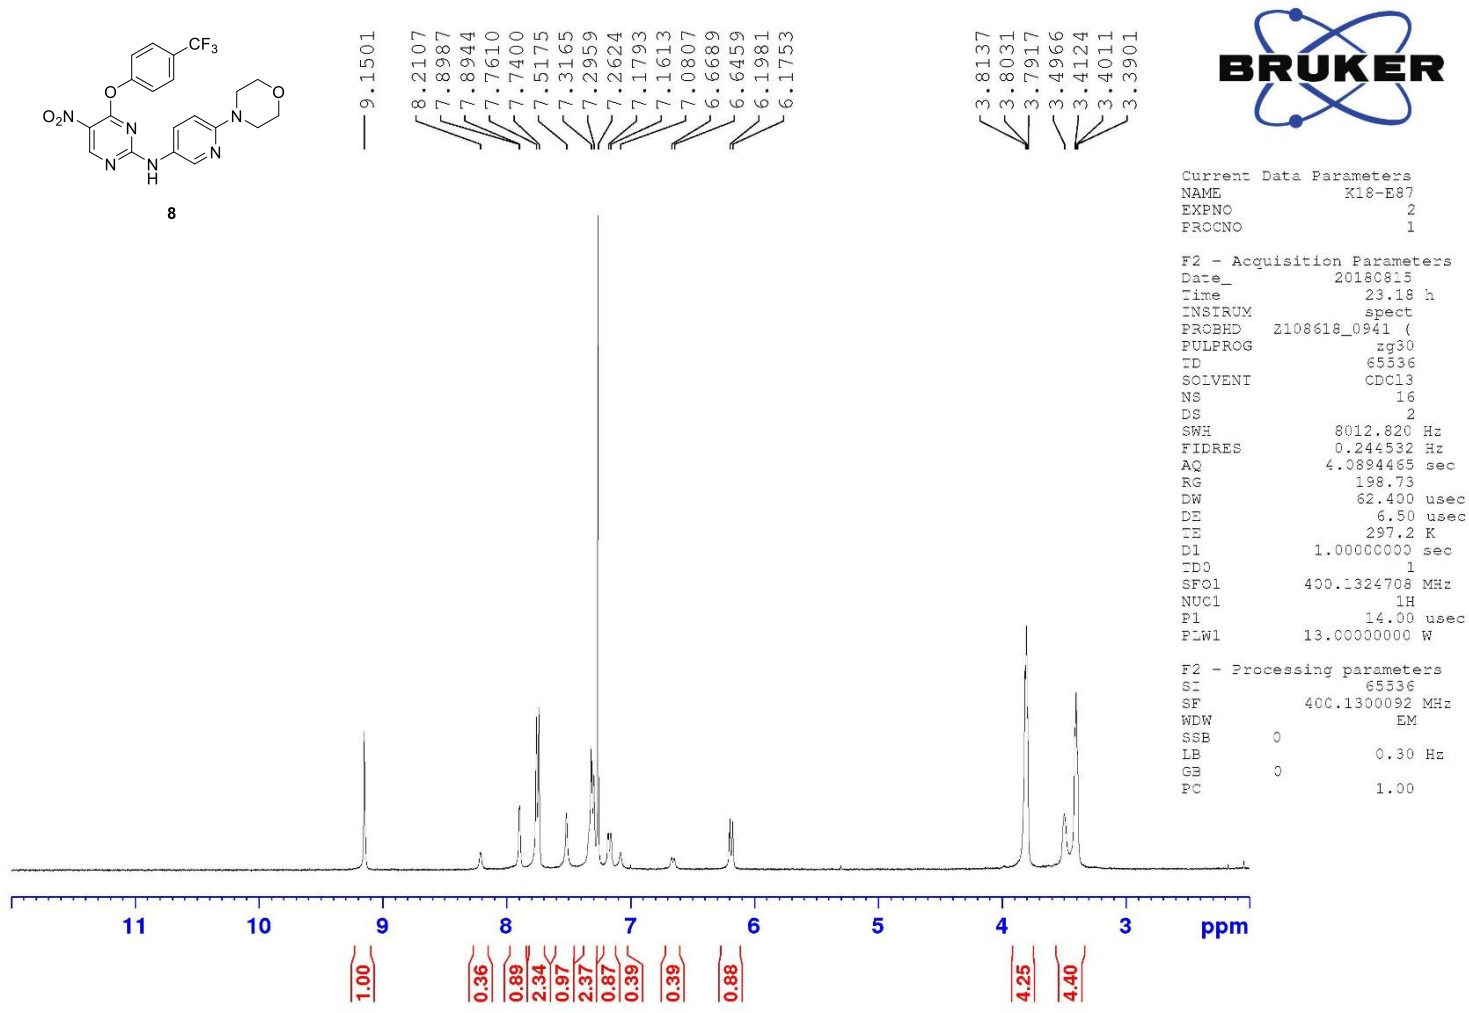

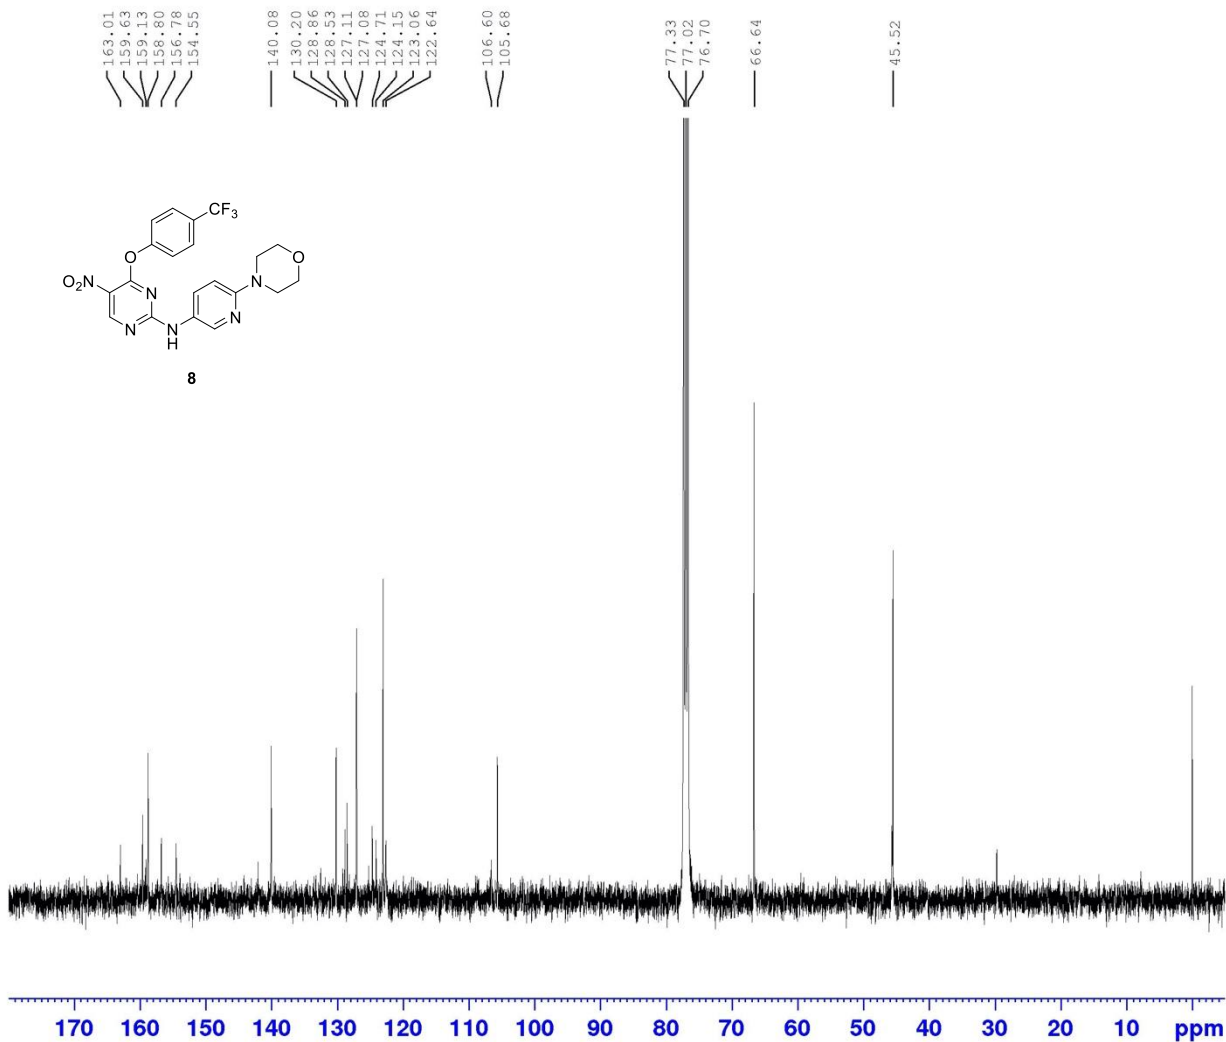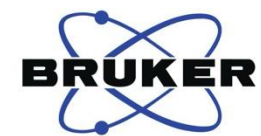

Current Data Parameters  
 NAME E87\_C13\_16\_10  
 EXPNO 1  
 PROCNO 1

F2 - Acquisition Parameters  
 Date\_ 20191016  
 Time 8.46  
 INSTRUM spect  
 PROBHD 5 mm PABBO BB/  
 PULPROG zgpg30  
 TD 65536  
 SOLVENT CDCl3  
 NS 10900  
 DS 4  
 SWH 24038.461 Hz  
 FIDRES 0.366798 Hz  
 AQ 1.3631488 sec  
 RG 190.62  
 DW 20.800 usec  
 DE 6.50 usec  
 TE 299.9 K  
 D1 2.0000000 sec  
 D11 0.0300000 sec  
 TD0 1

----- CHANNEL f1 -----  
 SFO1 100.6429474 MHz  
 NUC1 13C  
 P1 10.00 usec  
 PLW1 52.0000000 W

----- CHANNEL f2 -----  
 SFO2 400.2116008 MHz  
 NUC2 1H  
 CPDPRG[2] waltz16  
 PCPD2 90.00 usec  
 PLW2 12.0000000 W  
 PLW12 0.35777000 W  
 PLW13 0.28979000 W

F2 - Processing parameters  
 SI 32768  
 SF 100.6328850 MHz  
 WDW EM  
 SSB 0  
 LB 1.00 Hz  
 GB 0  
 PC 1.40

E88  
single\_pulse

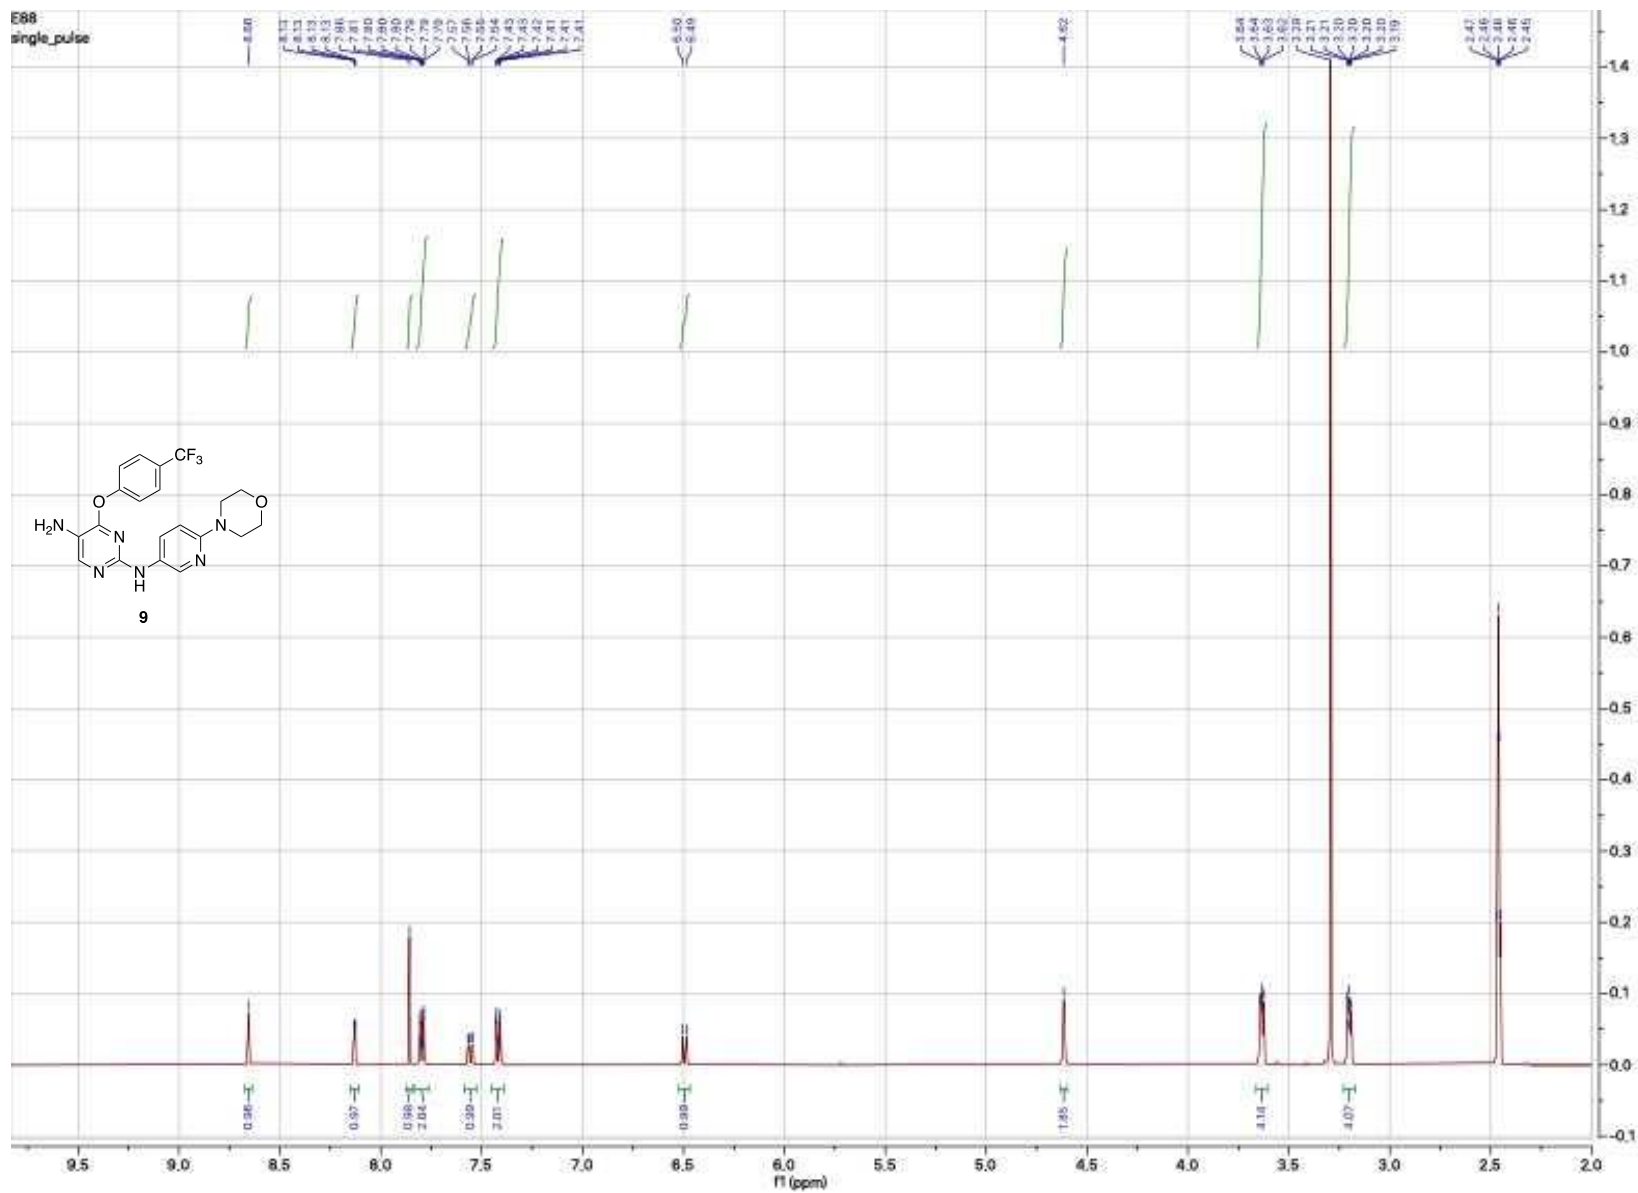

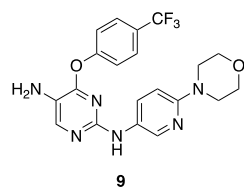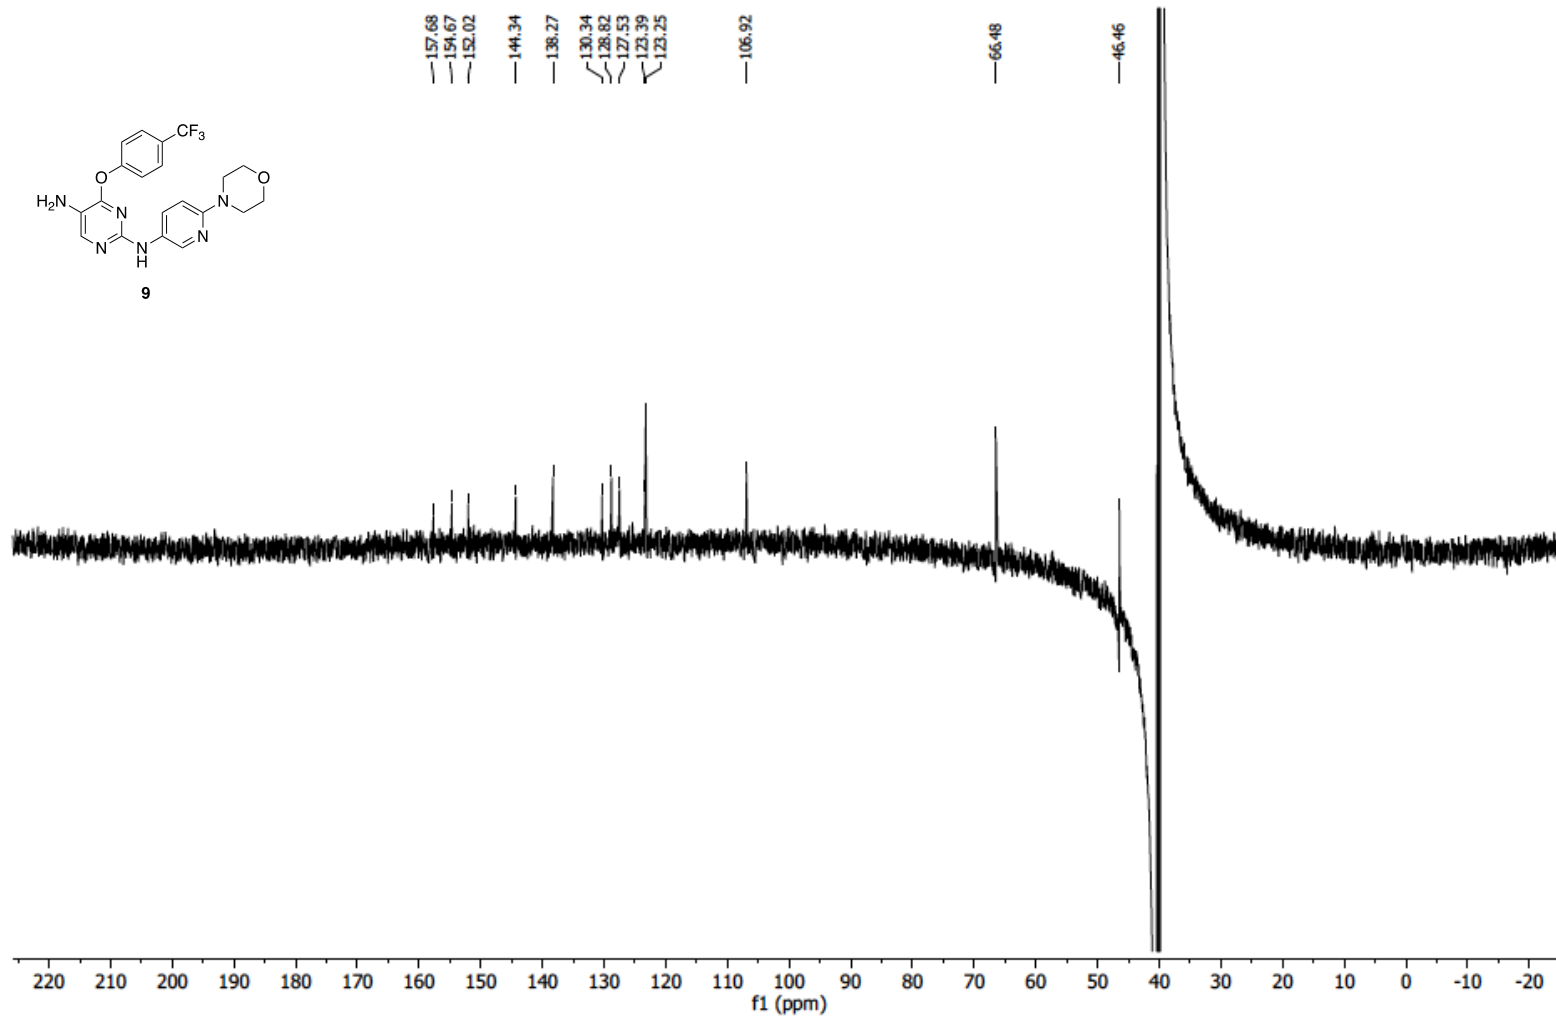

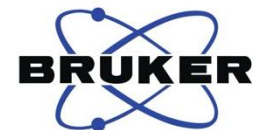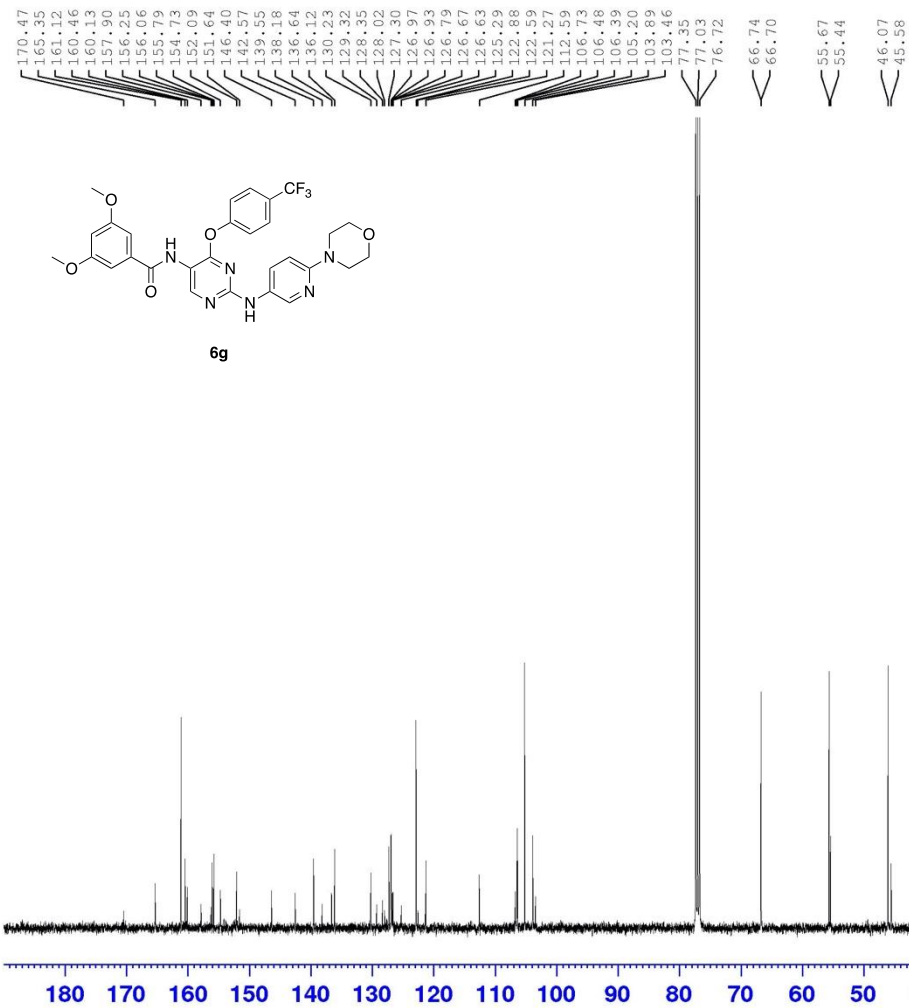

170.47  
165.35  
161.12  
160.46  
160.13  
157.90  
156.25  
156.06  
155.79  
154.73  
152.09  
151.64  
146.40  
142.57  
139.55  
138.18  
136.64  
136.12  
130.23  
129.32  
128.35  
128.02  
127.30  
126.97  
126.93  
126.79  
126.67  
126.63  
125.29  
122.88  
122.59  
121.27  
112.59  
106.73  
106.48  
106.39  
105.20  
103.89  
103.46  
77.35  
77.03  
76.72  
66.74  
66.70  
55.67  
55.44  
46.07  
45.58

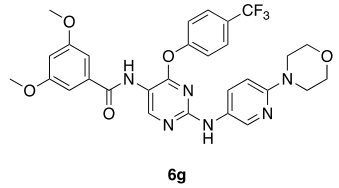

Current Data Parameters  
NAME K18-E89-C13  
EXPNO 1  
PROCNO 1

F2 - Acquisition Parameters  
Date\_ 20180810  
Time 1.12  
INSTRUM spect  
PROBHD 5 mm PABBO BB/  
PULPROG zgpg30  
TD 65536  
SOLVENT CDCl3  
NS 1024  
DS 4  
SWH 24038.461 Hz  
FIDRES 0.366798 Hz  
AQ 1.3631488 sec  
RG 190.62  
DW 20.800 usec  
DE 6.50 usec  
TE 298.2 K  
D1 2.0000000 sec  
D11 0.0300000 sec  
TD0 1

===== CHANNEL f1 =====  
SFO1 100.6429474 MHz  
NUC1 13C  
P1 10.00 usec  
PLW1 52.00000000 W

===== CHANNEL f2 =====  
SFO2 400.2116008 MHz  
NUC2 1H  
CPDPRG[2] waltz16  
PCPD2 90.00 usec  
PLW2 12.00000000 W  
PLW12 0.35777000 W  
PLW13 0.28979000 W

F2 - Processing parameters  
SI 32768  
SF 100.6328860 MHz  
WDW EM  
SSB 0  
LB 1.00 Hz  
GB 0  
PC 1.40

6g

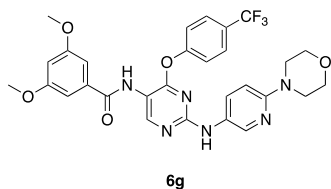

Molecular formula:  $C_{29}H_{27}F_3N_6O_5$

Exact mass: 596.1995

150.0577 (4+)

199.7410 (3+)

299.1076 (2+)

597.2073 (1+)

180822\_sample\_19\_x100\_pos 9 (0.184)

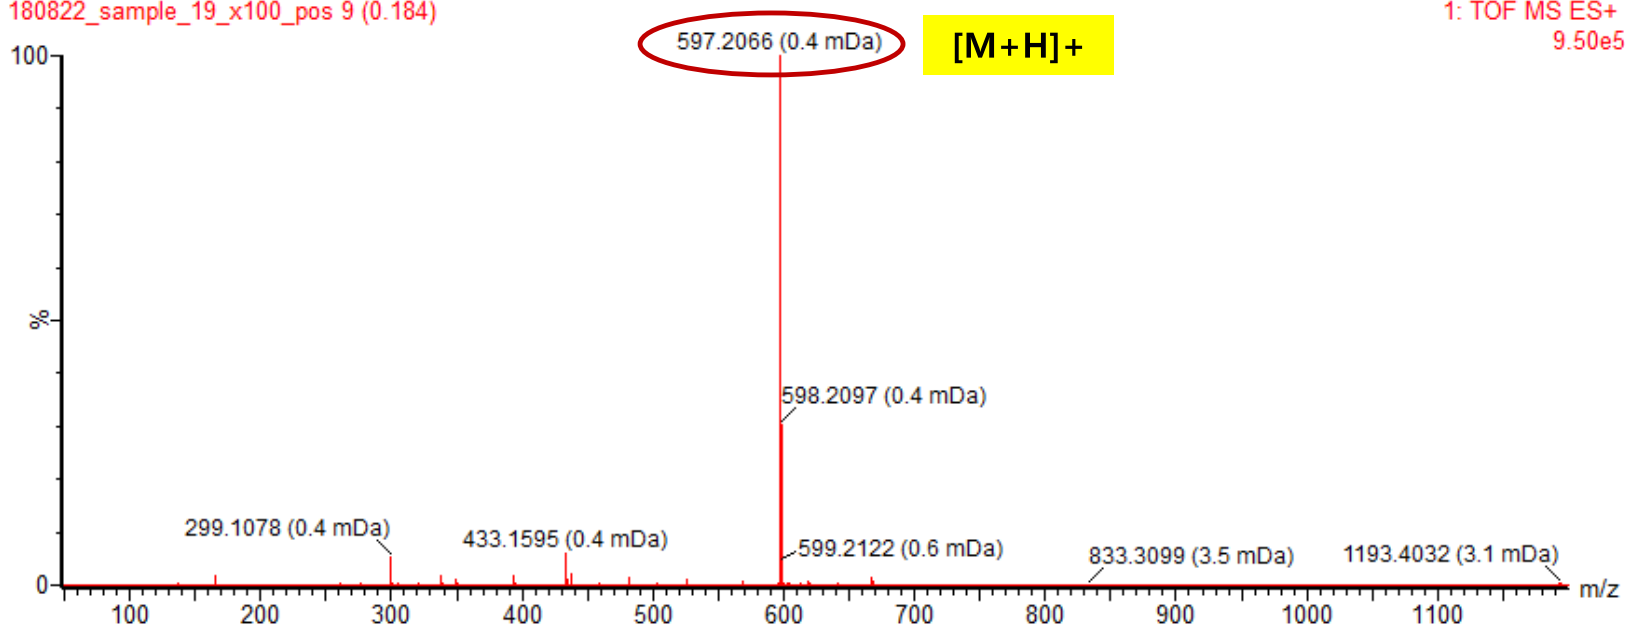

1: TOF MS ES+  
9.50e5



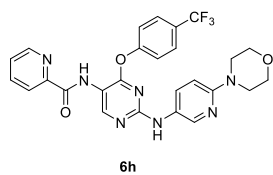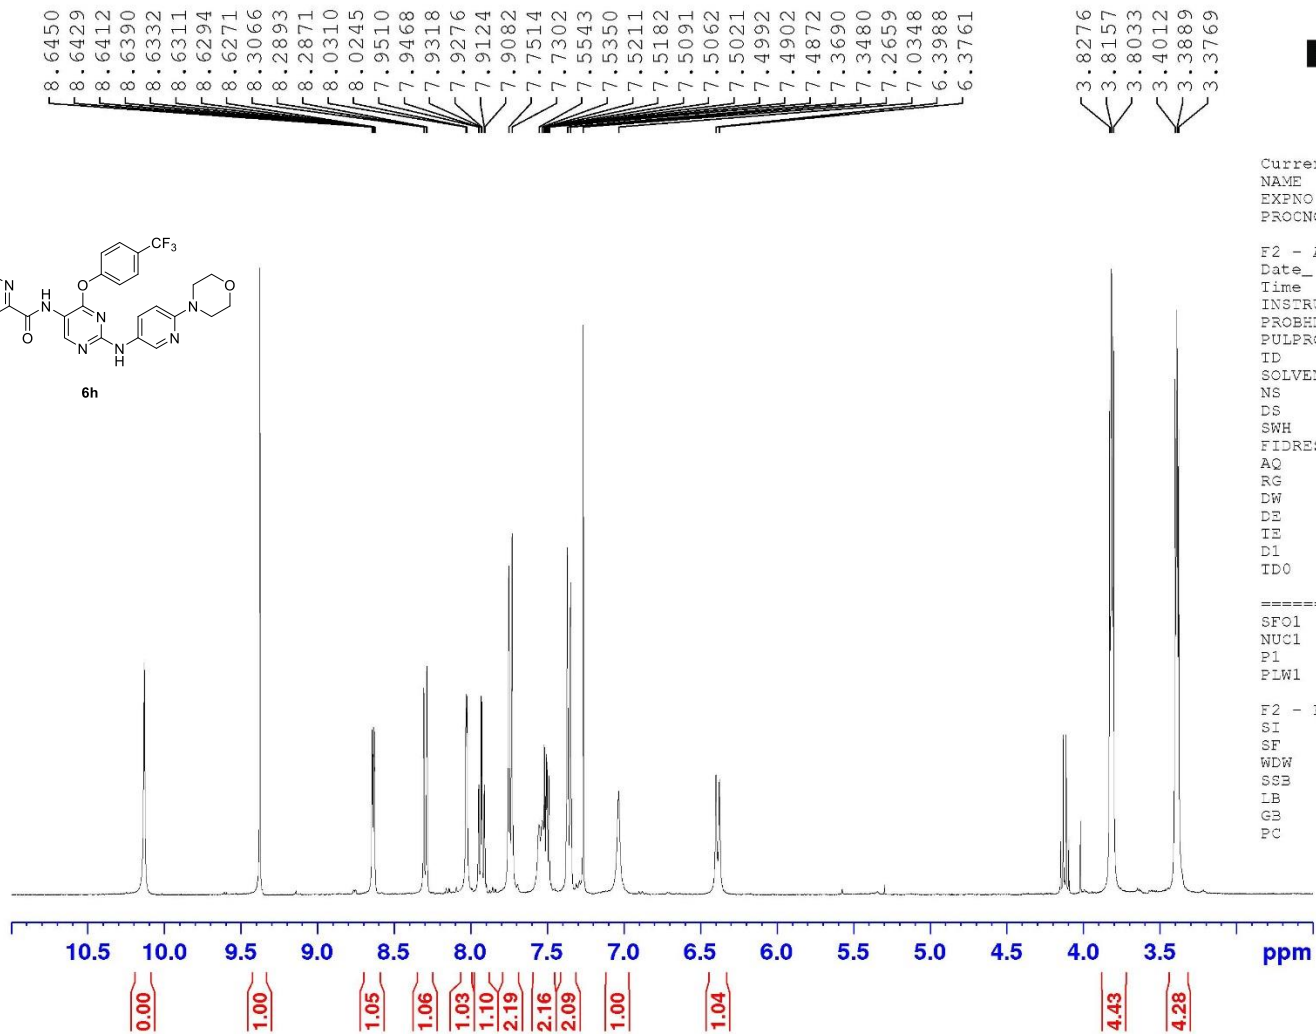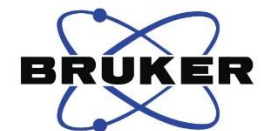

Current Data Parameters  
 NAME K18-E90  
 EXPNO 1  
 PROCNO 1

F2 - Acquisition Parameters  
 Date\_ 20180810  
 Time 1.33  
 INSTRUM spect  
 PROBHD 5 mm PABBO BB/  
 PULPROG zg30  
 TD 65536  
 SOLVENT CDCl3  
 NS 16  
 DS 2  
 SWH 8012.820 Hz  
 FIDRES 0.122266 Hz  
 AQ 4.0894465 sec  
 RG 190.62  
 DW 62.400 usec  
 DE 6.50 usec  
 TE 297.1 K  
 D1 1.00000000 sec  
 TD0 1

===== CHANNEL f1 =====  
 SFO1 400.2124715 MHz  
 NUC1 1H  
 P1 15.54 usec  
 PLW1 12.00000000 W

F2 - Processing parameters  
 SI 65536  
 SF 400.2100110 MHz  
 WDW EM  
 SSB 0  
 LB 0.30 Hz  
 GB 0  
 PC 1.00

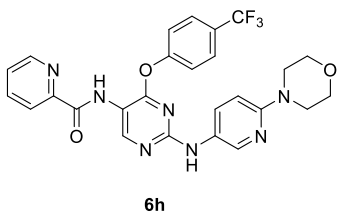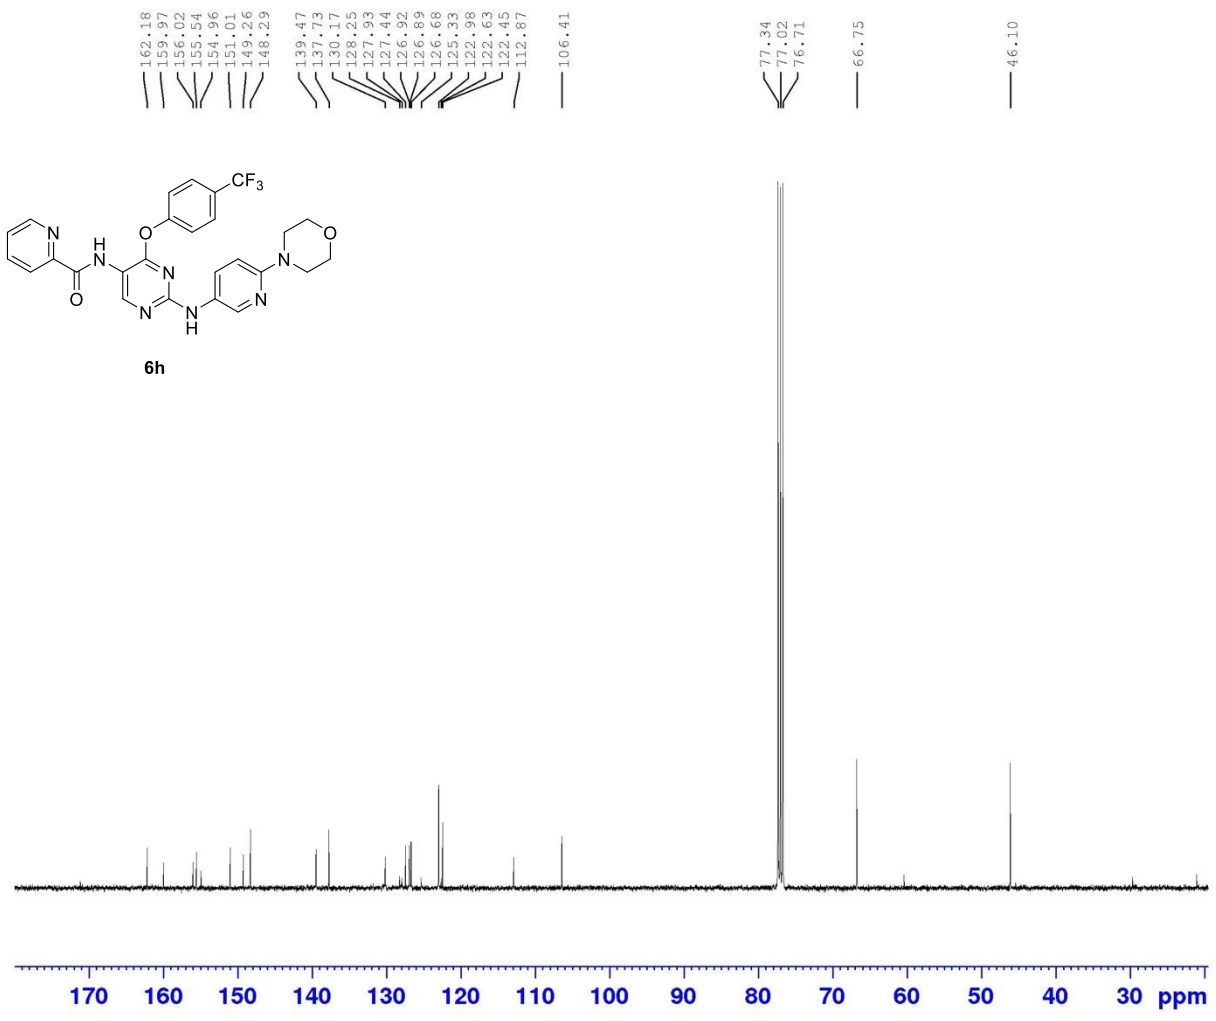

162.18  
159.97  
156.02  
155.54  
154.96  
151.01  
149.26  
148.29  
139.47  
137.73  
130.17  
128.25  
127.93  
127.44  
126.92  
126.89  
126.68  
125.33  
122.98  
122.63  
122.45  
112.67  
106.41

77.34  
77.02  
76.71  
66.75  
46.10

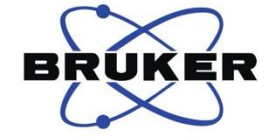

```

Current Data Parameters
NAME      K18-E90-C13
EXPNO     1
PROCNO    1

F2 - Acquisition Parameters
Date_     20180810
Time      2.36
INSTRUM   spect
PROBHD    5 mm PABBO BB/
PULPROG   zgpg30
TD         65536
SOLVENT   CDCl3
NS         1024
DS         4
SWH       24038.461 Hz
FIDRES    0.366798 Hz
AQ         1.3631488 sec
RG         190.62
DW         20.800 usec
DE         6.50 usec
TE         298.3 K
D1         2.00000000 sec
D11        0.03000000 sec
TD0        1

===== CHANNEL f1 =====
SFO1      100.6429474 MHz
NUC1       13C
P1         10.00 usec
PLW1       52.00000000 W

===== CHANNEL f2 =====
SFO2      400.2116008 MHz
NUC2       1H
CPDPRG[2] waltz16
PCPD2     90.00 usec
PLW2      12.00000000 W
PLW12     0.35777000 W
PLW13     0.28979000 W

F2 - Processing parameters
SI         32768
SF         100.6328860 MHz
WDW        EM
SSB        0
LB         1.00 Hz
GB         0
PC         1.40

```

6h

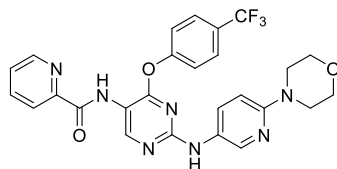

6h

Molecular formula:  $C_{26}H_{22}F_3N_7O_3$

Exact mass: 537.1736

135.3012 (4+)

180.0657 (3+)

269.5946 (2+)

538.1814 (1+)

180822\_sample\_20\_x100\_pos 10 (0.201)

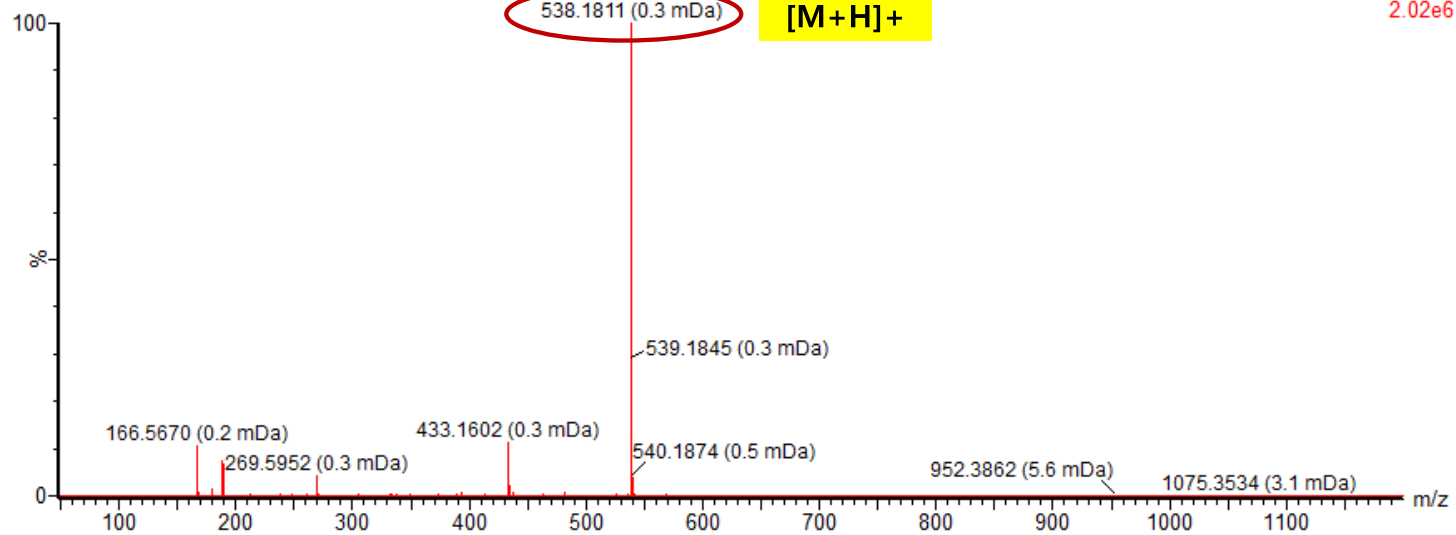

## **2. Biological experimental data**

### **2.1. *In vitro* antiproliferative assay using M-NFS-60 cell lines**

#### **Materials:**

Test compounds and staurosporine were dissolved in DMSO in 10 mM stock. Staurosporine was purchased from Sigma-Aldrich (Saint Louis, MI). Cell Titer-Glo® 2.0 Luminescent cell viability assay reagent was purchased from Promega (Madison, WI). M-NFS-60 cell line was purchased from American Type Culture Collection (Manassas, VA). Cell culture media were as follow: RPMI-1640 + 10% FBS + 20 ng/ml M-CSF. All media are supplemented with 100 µg/mL of penicillin, and 100 µg/mL of streptomycin. Cultures were maintained at 37°C in a humidified atmosphere of 5% CO<sub>2</sub> and 95% air.

#### **Procedures:**

1. Test compounds and staurosporine were diluted in DMSO solution with 10-dose and 3-fold dilutions in a source plate starting at 10 mM.
2. 25 nL of each test compound or staurosporine was delivered from the source plate to each well of the 384-well cell culture plates by Echo 550.
3. 25 µL of culture media containing 2000 M-NFS-60 cells was added to each of the wells in duplicates of the cell culture plate.
4. The cells were incubated with the compounds at 37°C, 5% CO<sub>2</sub> for 72 hours.

- 25  $\mu\text{L}$  of Cell Titer Glo 2.0 reagent was added to each well.
- The contents were mixed on an orbital shaker for 2 min and incubated at room temperature for 15 min to stabilize luminescent signal.
- Luminescence was recorded by Envision 2104 Multilabel Reader (PerkinElmer, Santa Clara, CA). The number of viable cells in culture was determined based on quantitation of the ATP present in each culture well.
- The  $\text{IC}_{50}$  curves were plotted and  $\text{IC}_{50}$  values were calculated using the GraphPad Prism 4 program based on a sigmoidal dose-response equation.

## 2.2.PAMPA-GIT Assay [1-3]

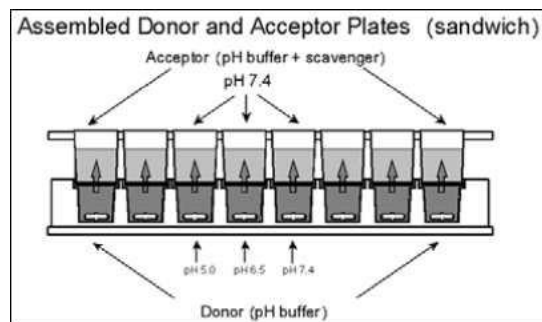

The effective permeabilities of compound **6e**, and two reference drugs (Verapamil and Ranitidine) were assessed using Double-Sink™ (Pion, GI-PAMPA) via applying a donor 96 well-plate microtitre and an acceptor 96-well filter plate to form a sandwich as illustrated in the figure. Thus, each well is divided into two chambers, separated by a GI-PAMPA membrane. 10 mM DMSO stock

solutions of the tested compounds and reference drugs were prepared and diluted with Prisma buffer solution (pH = 7.4) to provide solutions of 12.5 (**6e**) and 50  $\mu\text{M}$  (reference drugs) concentrations, which were placed in the wells of the donor plate. The acceptor plate containing buffer was placed and allowed to incubate for 4 h at 26 °C. The acceptor plate was removed and the concentration of compounds in the acceptor, the donor, and the reference wells were measured by UV (230–498 nm). The effective permeability ( $P_e$ ) of each compound was calculated using Pion PAMPA Explorer software (version 3.8) applying calculation basis double sink (acceptor+donor+membrane). The following  $P_e$  ranges were established: low penetration of GIT ( $P_e < 1.5 \times 10^{-6}$ ), high penetration of GIT ( $P_e > 1.5 \times 10^{-6}$ ).

### **References:**

- [1] M. Kansy, F. Senner, K. Gubernator, Physicochemical High Throughput Screening: Parallel Artificial Membrane Permeation Assay in the Description of Passive Absorption Processes, *Journal of Medicinal Chemistry*, 41 (1998) 1007-1010.
- [2] High-Throughput Measurements of Solubility Profiles, in: *Pharmacokinetic Optimization in Drug Research*.
- [3] A. Avdeef, M. Strafford, E. Block, M.P. Balogh, W. Chambliss, I. Khan, Drug absorption in vitro model: filter-immobilized artificial membranes: 2. Studies of the permeability properties of lactones in *Piper methysticum* Forst, *Eur. J. Pharm. Sci.*, 14 (2001) 271-280.
